# Supplementary material
Source: PubMed Central journal article supplement (PMC2664352)

## Electronic Supplementary Material

### MATERIALS AND METHODS

#### (a) *Selective exclusion experiments*

Fifty *Phyllanthus lepidocarpus* plants were collected from a wild population in Kyoto and transplanted individually to 500-ml pots. The plants were kept in a greenhouse for 1 week, and 15–39 female flowers that opened during this period were marked for each plant. We then applied one of the following four treatments: (i) the plants were bagged with fine netting to exclude all flower visitors ( $N = 15$ ), (ii) bagged as above, but ants were allowed to freely forage through a slit (width, 5 mm) at the bottom of the bagging ( $N = 15$ ), (iii) bagged and self-pollinated by hand ( $N = 5$ ), or (iv) left unbagged as controls ( $N = 15$ ). The experimental pots were placed in the Kyoto University campus, where ants were abundant, for 1 week, and the proportion of marked flowers that developed into fruits was calculated for each plant. During the experiment, we monitored the “ants-only” plants at various times of the day, between 800 and 2200 h, for a total of 12 h and confirmed that no insects other than the ant *Aphaenogaster famelica* were present on the plants.

#### (b) *Taxon sampling for the Epicephala phylogenetic analysis*

The genus *Epicephala* currently consists of > 40 described species with little known larval biology (de Prins & de Prins 2005) and most likely includes a large number of undescribed species as sampled in this study. However, many of the described species are known only from the type collections and lack sufficient descriptions of genitalia and wing venation, which provide explicit features for the grouping of genera in Gracillariidae (Vári 1961). Because we did not include any described species of *Epicephala* or thoroughly sample species from related genera, we were unable to test the monophyly of the genus or explicitly investigate the origin of seed feeding within the family. Nevertheless, our extensive sampling of *Epicephala* moths from a broad range of Phyllanthaceae hosts (table 1) provides a sound basis for investigating overall evolutionary pattern of pollinating behavior and host associations in the genus, and estimating their divergence times. Sampling of *Cuphodes diospyrosella* and *Stomphastis labyrinthica* is based on distinct morphological apomorphies in male and female

genitalia that they share with species of *Epicephala* (A. K., unpublished data).

*Melanocercops ficuvorella* was sampled as the farthest outgroup to allow estimation of branch length leading to the ingroup, which is required in the analyses of ancestral character states and divergence times.

### (c) *Cophylogenetic analysis*

To test whether the plant and moth phylogenies are associated at random at higher taxonomic levels, we performed the ParaFit (Legendre *et al.* 2002) analysis based on patristic distances calculated along the ML phylogeny using PATRISTIC 1.0 (Fourment & Gibbs 2006). Because the phylogenetic results for *Epicephala* indicated that major moth clades have specific associations with particular host taxonomic groups, we reduced the following six clades to single terminal taxa: Malagasy *Phyllanthus* clade, *Glochidion* clade, *Phyllanthus* section *Gomphidium* clade, *Breynia* clade, *Phyllanthus* subgenus *Kirganelia* clade, and *Phyllanthus* section *Adenoglochidion* clade (see fig. S2 for clade names). Pruning was done by averaging patristic distances across all constituent species in each clade. Similarly, we extracted the species hosting *Epicephala* from the plant phylogeny and constructed a patristic distance matrix by reducing the above-mentioned taxonomic groups to single taxa.

### (d) *Phyllanthaceae fossils*

A list of known Phyllanthaceae fossils is given in table S7. Of these, we selected the following four non-redundant fossils as minimum age constraints in the divergence time estimation of the Phyllanthaceae phylogeny: *Bischofia*-type pollen from Bartonian, Middle Eocene (37.2 mya); *Actephila*-type pollen from Late Eocene (33.9 mya); *Phyllanthus*-type pollen from Early Eocene (48.6 mya) (Gruas-Cavagnetto & Köhler 1992); and *Glochidion* leaf impressions from Middle Miocene (11.6 mya) (Prasad 1994; Antal & Prasad 1996). Ages of the fossils are given as the upper boundaries of epochs/stages to which they belong (geologic times based on Gradstein *et al.* 2004). The *Actephila*-type pollen had palynological features most closely related to *Actephila* but also showed some affinity to genera such as *Andrachne*, *Leptopus*, and *Meinekia* (Gruas-Cavagnetto & Köhler 1992), all of which are members of Poranthereae; thus, we used this fossil to provide minimum age for the Poranthereae–Wielandieae split (fig. S3). We did not use the *Reverchonia*-type pollen to constrain the age of *Reverchonia*,

because this fossil pollen does not precisely match those of the modern species (the monotypic *Reverchonia arenaria*; Sagun & van der Ham 2003) and exhibits some features associated with members of *Phyllanthus* (Gruas-Cavagnetto & Köhler 1992). Thus, we regard this fossil as *Phyllanthus* to be conservative, which consequently becomes redundant to the older *Phyllanthus*-type pollen. We also did not use the *Bridelia* wood fossil, because the assignment of Phyllanthaceae wood fossils to modern taxa is not straightforward (Prakash *et al.* 1986) and the age of the present fossil is too young to provide a meaningful lower bound on node ages. Because precise attribution of some of the Phyllanthaceae fossils may still require refinements (Gruas-Cavagnetto & Köhler 1992), the estimated divergence times may be revised when fossils with a more reliable taxonomic placement become available. Nevertheless, taxa belonging to Phyllanthaceae are well represented in the fossil record during the Eocene–Miocene times (table S7), providing evidence for the antiquity of the tribe as a whole.

(e) *Priors for Bayesian divergence time estimation*

The following prior distributions on parameters were used for the Bayesian divergence time estimation in Phyllanthaceae. The prior mean  $\pm$  SD for the age at root node was set to either  $125 \pm 20$  myr (based on the earliest occurrence of eudicot pollen; Magallón *et al.* 1999) or  $108 \pm 20$  myr (based on the estimated maximum age of the corresponding node in Davis *et al.* 2003). These values were divided by 100 so that they fall between 0.1 and 10, which is the recommended range of prior mean for the root age. The corresponding prior distributions of rate at root node were  $0.88 \pm 0.44$  and  $0.1 \pm 0.05$ , which were obtained by dividing the median of the distances between the ingroup root and the tips by the respective prior root age (standard deviations were set to half the values of the means). The prior for the Brownian motion parameter was  $1.0 \pm 1.0$  for both analyses, which fall between 1 and 2 when multiplied by the prior root age, as recommended by the program manual.

The prior distributions on parameters for the *Epicephala* divergence time estimation were as follows. The root node age was set to  $1.0 \pm 0.0$ , which is equivalent to fixing the root age with one unit time, the rate at ingroup root was  $0.12 \pm 0.06$ , based on median distance between the ingroup root and the tips, and the Brownian motion parameter was  $1.0 \pm 1.0$ , as recommended by the manual.

## RESULTS

### (a) Associations with *Epicephala* in *Phyllanthaceae*

The examination of flowers and fruits in *Phyllanthaceae* showed that 18 of the 26 species studied did not have associations with *Epicephala* moths (table S1), indicating that they are not involved in pollination of these species. In turn, *Epicephala* moths parasitized fruits in eight of the 26 species studied. Of these, four species (*P. reticulatus*, *P. sp.*, *P. marojejiensis*, and *P. humbertii*) belonging to two major *Phyllanthus* taxonomic groups (section *Anisonema* and unclassified Malagasy clade) were newly found to have the *Epicephala* pollination system on the grounds that there was a significant association between pollinated status and the presence of *Epicephala* eggs in female flowers (table S2), the styles were simple and not spread (fig. 2 in the printed paper), and/or female moths were observed pollinating flowers. *Epicephala* moths associated with *P. reticulatus* were observed pollinating female flowers in a manner typical of other actively pollinating species. We also collected a single female on a *P. marojejiensis* plant that bore > 100 pollen grains on her proboscis, suggesting that this species is also a pollinator.

The remaining four species that had associations with *Epicephala* (*F. suffruticosa*, *P. ussuriensis*, *P. lepidocarpus*, and *P. amarus*) were visited by abundant diurnal insects (table S3). *Flueggea suffruticosa* attracted a wide variety of insects that foraged for nectar and pollen, which are likely pollinators of this plant. The other three species, which are all herbaceous, were visited predominantly by ants, and pollination experiments in *P. lepidocarpus* indicated that ants are effective pollinators (table S8). Observation of *Epicephala* moth behaviour suggested that the moths do not pollinate these flowers. In *F. suffruticosa*, female moths laid eggs in flower buds, flowers, or developing fruits and did not carry pollen grains on the proboscis ( $N = 32$ ). In *P. lepidocarpus* and *P. amarus*, *Epicephala* females laid eggs only in young fruits and carried no pollen grains ( $N = 15$  and 9, respectively). The absence of *Epicephala* moths in some of the studied populations of these plants further indicates that they are not dependent on *Epicephala* for pollination. Based on these observations, we conclude that *Epicephala* moths associated with the above four species are truly parasitic, non-pollinating seed parasites.

(b) *Divergence time estimation in Epicephala*

Calibration of the *Epicephala* tree based on the COI molecular clock (1.5% myr<sup>-1</sup>) suggested that the crown group *Epicephala* most likely diverged 20–35 mya (fig. 4 in the printed paper). The estimated constant rate of COI sequence divergence in arthropods ranges between 1.3% and 2.3% myr<sup>-1</sup> (Brower 1994; Quek *et al.* 2004). However, the use of higher rates would only result in younger estimates for the *Epicephala* root node; thus, our method is conservative with respect to providing young ages. The outlying old age estimates (fig. 4) were contributed by the shallowest nodes on the *Epicephala* chronogram, which are most prone to stochastic error in divergence time estimations (Ho *et al.* 2005; Sota & Hayashi 2007). On the other hand, ages provided by deeper nodes clustered within a narrow time frame between 20 and 30 mya (fig. 4). When the moth tree is calibrated with 25 mya at the *Epicephala* crown group (fig. 3), roughly concordant ages were obtained for the associated plant and moth clades, indicating the robustness of our age estimates (e.g., *Phyllanthus* section *Gomphidium* and their pollinators, 7.75–15.16 and 7.36–10.47 mya, respectively; section *Adenoglochidion* and pollinators, 2.56–7.98 and 5.38–9.24 mya, respectively; *Breynia* and pollinators, 5.01–13.26 and 3.32–5.34 mya, respectively; *Glochidion* and pollinators, 1.46–4.69 mya and 5.26–8.08 mya, respectively).

## REFERENCES

- Agarwal, A. 2002 Contributions to the fossil leaf assemblage from Miocene, Neyveli lignite deposits, Tamil Nadu, India. *Palaeontogr. Abt.* **B261**, 167–206.
- Agarwal, A. & Mandaokar, B. 2002 A leaf impression from early Miocene of Mizoram, India. *Phytomorphology* **52**, 311–314.
- Antal, J. S. & Prasad, M. 1996 Some more leaf-impressions from the Himalayan foot-hills of Darjeeling District, West Bengal, India. *Palaeobotanist* **43**, 1–9.
- Davis, C. C., Webb, C. O., Wurdack, K. J., Jaramillo, C. A. & Donoghue, M. J. 2005 Explosive radiation of Malpighiales supports a mid-Cretaceous origin of modern tropical rain forests. *Am. Nat.* **165**, E36–E65.
- De Prins, W. & de Prins, J. 2005 *World Catalogue of Insects, Vol. 6, Gracillariidae (Lepidoptera)*. Stenstrup, Denmark: Apollo Books.
- Dorofeev, P. I. 1958 Novye dannye ob oligocenovoj flore u. d. Rezenki v Zapadnoj Sibiri. *Dokl. Akad. nauk SSSR* **123**, 171–174.

- Dorofeev, P. I. 1959 Ob oligocenovoj flore s. Kozjulino v ust'e r. Tomi. *Dokl. Akad. nauk SSSR* **127**, 1103–1105.
- Dorofeev, P. I. 1960 Novye danne o treticnych florach Kireevskovo Jara na r. Obi. *Dokl. Akad. nauk SSSR* **133**, 211–213.
- Fourment, M. & Gibbs, M. 2006 PATRISTIC: a program for calculating patristic distances and graphically comparing the components of genetic change. *BMC Evol. Biol.* **6**, 1.
- Gradstein, F. M., Ogg, J. G. & Smith, A. G. 2004 *A Geologic Time Scale 2004*. Cambridge, MA: Cambridge University Press.
- Gruas-Cavagnetto, C. & Köhler, E. 1992 Pollens fossiles d'Euphorbiacées de l'Eocène français. *Grana* **31**, 291–304.
- Ho, S. Y. W., Phillips, M. J., Cooper, A. & Drummond, A. J. 2005 Time dependency of molecular rate estimates and systematic overestimation of recent divergence times. *Mol. Biol. Evol.* **22**, 1561–1568.
- Lancucka-Srodoniowa, M. 1966 Tortonian flora from the “Gdow-Bay” in the South of Poland. *Acta Palaeobot.* **7**, 3–135.
- Legendre, P., Desdevises, Y. & Bazin, E. 2002 A statistical test for host–parasite coevolution. *Syst. Biol.* **51**, 217–234.
- Li, C. Y., Wang, C. M., Hsiao, J. Y. & Yang, C. H. 2003 Two fossil dicotyledonous woods from the Kungkuan Tuff (Early Miocene), northern Taiwan. *Col. Res.* **16**, 71–78.
- Magallón, S., Crane, P. R. & Herendeen, P. S. 1999. Phylogenetic pattern, diversity, and diversification of eudicots. *Ann. MO Bot. Gard.* **86**, 297–372.
- Mai, D. H. 1996 Zwei neue Arten von Samen aus dem deutschen Jungtertiär. *Feddes Repert.* **107**, 299–393.
- Prakash, U., Bande, M. B. & Lalitha, V. 1986 The genus *Phyllanthus* from Tertiary of India with critical remarks on the nomenclature of fossil woods of Euphorbiaceae. *Palaeobotanist* **35**, 106–114.
- Prasad, M. 1994 Siwalik (Middle Miocene) leaf impressions from the foothills of the Himalayas, India. *Tertiary Res.* **15**, 53–90.
- Prasad, M. & Awasthi, N. 1996 Contributions to the Siwalik flora from Surai khola sequence, western Nepal and its palaeoecological and phytogeographical implications. *Palaeobotanist* **43**, 1–42.

- Prasad, M., Antal, J. S., Tripathi, P. P. & Pandey, V. K. 1999 Further contribution of the Siwalik flora from the Koilabas area, western Nepal. *Palaeobotanist* **48**, 49–95.
- Quek, S. P., Davies, S. J., Itino, T. & Pierce, N. E. 2004 Codiversification in an ant–plant mutualism: stem texture and the evolution of host use in *Crematogaster* (Formicidae: Myrmicinae) inhabitants of *Macaranga* (Euphorbiaceae). *Evolution* **58**, 554–570.
- Sagun, V. G. & van der Ham, R. W. J. M. 2003 Pollen morphology of the Flueggeinae (Euphorbiaceae, Phyllanthoideae). *Grana* **42**, 193–219.
- Sota, T. & Hayashi, M. 2007 Comparative historical biogeography of *Plateumaris* leaf beetles (Coleoptera: Chrysomelidae) in Japan: interplay between fossil and molecular data. *J. Biogeogr.* **34**, 977–993.
- Vári, L. 1961 South African Lepidoptera, Vol. I, Lithocolletidae. *Transv. Mus. Mem.* **12**, 1–238.
- Yang, J. J., Qi, G. F., Xu, R. H. & Yang L. M. 1998 Studies on three fossil woods of Euphorbiaceae excavated from Wuhan area. *Acta Bot. Sin.* **40**, 68–76.
- Zaklinskaja, E. D. 1978 Palynology of Paleogene clay from DSDP Site 368, Cape Verde Rise. *Init. Rep. Deep Sea Drill. Proj.* **41**, 933–937.

## Figure legends

Figure S1. Bayesian majority consensus cladogram of Phyllanthaceae based on 4,059-bp aligned sequences of combined plastid *matK*, *ndhF*, *atpB*, and nuclear *PHYC* genes. Numbers indicate maximum parsimony and likelihood bootstrap values, and Bayesian posterior probability (from top to bottom; shown only when > 50). Asterisks indicate maximal nodal support (100 for all three measures).

Figure S2. Bayesian majority consensus cladogram of *Epicephala* based on 2,933-bp aligned sequences of combined mitochondrial *COI* and nuclear *ArgK*, *EF-1 $\alpha$* , *Wg*, and *18S rDNA* genes. Numbers indicate parsimony and likelihood bootstrap values, and Bayesian posterior probability (from top to bottom; shown only when > 50). Asterisks indicate maximal nodal support (100 for all three measures). *Epicephala* species are currently all undescribed; thus, host associations are given as taxon labels. Associated host taxonomic groups are also given.

Figure S3. Penalized likelihood chronogram of Phyllanthaceae based on 4,059-bp aligned sequences of combined plastid *matK*, *ndhF*, *atpB*, and nuclear *PHYC* genes. Maximum age constraint (*a*) and minimum age fossil constraints (*b–e*) are indicated. 95% confidence intervals are shown with shaded bars.

Figure S4. Penalized likelihood chronogram of *Epicephala* based on 2,933-bp aligned sequences of combined mitochondrial *COI* and nuclear *ArgK*, *EF-1 $\alpha$* , *Wg*, and *18S rDNA* genes. Branches are scaled to one arbitrary time unit fixed at the root node. 95% confidence intervals are shown with shaded bars.



**Table S1. Presence/absence of *Epicephala* larvae in fruits and eggs in flowers**

| Species                      | Locality     | Fruits                 |                               | Fruits infested (%) | Flowers                 |                           |                          |
|------------------------------|--------------|------------------------|-------------------------------|---------------------|-------------------------|---------------------------|--------------------------|
|                              |              | No. of fruits (plants) | Ovules per fruit <sup>†</sup> |                     | No. of flowers (plants) | No. of flowers pollinated | Pollinated with eggs (%) |
| <i>Margaritaria</i>          |              |                        |                               |                     |                         |                           |                          |
| <i>M. discoidea</i>          | Bossou       | 28 (1)                 | 6                             | 0                   | n. a.                   | n. a.                     | n. a.                    |
| <i>Flueggea</i>              |              |                        |                               |                     |                         |                           |                          |
| <i>F. suffruticosa</i>       | Hyogo        | 461 (4)                | 6                             | 51                  | 379 (2)                 | 379                       | 13.2                     |
|                              | Hiroshima    | n. a.                  | n. a.                         | n. a.               | 393 (8)                 | 365                       | 6.3                      |
|                              | Amami Is.    | 115 (2)                | 6                             | 0                   | n. a.                   | n. a.                     | n. a.                    |
| <i>F. virosa</i>             | Vieng Xai    | 243 (3)                | 6                             | 0                   | n. a.                   | n. a.                     | n. a.                    |
| <i>Phyllanthus</i>           |              |                        |                               |                     |                         |                           |                          |
| <i>P. (Is.) ussuriensis</i>  | Tokyo        | 29 (12)                | 6                             | 44.8                | n. a.                   | n. a.                     | n. a.                    |
|                              | Kyoto        | 148 (6)                | 6                             | 0                   | 275 (6)                 | 217                       | 0                        |
| <i>P. (Is.) virgatus</i>     | Vientiane    | 233 (31)               | 6                             | 0                   | n. a.                   | n. a.                     | n. a.                    |
| <i>P. (Er.) liukuensis</i>   | Okinawa Is.  | 139 (16)               | 6                             | 0                   | 82 (11)                 | 53                        | 0                        |
| <i>P. (Er.) pulcheroides</i> | Mahaxai      | 53 (6)                 | 6                             | 0                   | 38 (4)                  | 17                        | 0                        |
| <i>P. (Ki.) flexuosus</i>    | Kyoto        | 193 (4)                | 6                             | 0                   | 81 (4)                  | 72                        | 0                        |
|                              | Hyogo        | 51 (1)                 | 6                             | 0                   | n. a.                   | n. a.                     | n. a.                    |
|                              | Miyazaki     | 79 (2)                 | 6                             | 0                   | n. a.                   | n. a.                     | n. a.                    |
| <i>P. (Ki.) oligospermus</i> | Yonaguni Is. | 123 (5)                | 6                             | 0                   | 182 (3)                 | 167                       | 0                        |
| <i>P. (Ki.) reticulatus</i>  | Henchun      | 61 (3)                 | 16.4 (12–20)                  | 78.7                | 251 (3)                 | 120                       | 89.2                     |
| <i>P. (Ki.) sp.</i>          | Lakxao       | n. a.                  | n. a.                         | n. a.               | 170 (2)                 | 54                        | 94.4                     |
| <i>P. (Ki.) tenellus</i>     | Okinawa Is.  | 322 (7)                | 6                             | 0                   | 190 (10)                | 169                       | 0                        |
| <i>P. (Ph.) lepidocarpus</i> | Kyoto        | 100 (5)                | 6                             | 0                   | 106 (5)                 | 104                       | 0                        |
|                              | Miyako Is.   | 184 (10)               | 6                             | 17.4                | 129 (10)                | 114                       | 0                        |
|                              | Ishigaki Is. | 207 (10)               | 6                             | 49.8                | 176 (10)                | 162                       | 0                        |
| <i>P. (Ph.) amarus</i>       | Ishigaki Is. | 212 (6)                | 6                             | 0                   | 171 (6)                 | 148                       | 0                        |
| <i>P. (Ph.) debilis</i>      | Ishigaki Is. | 76 (7)                 | 6                             | 0                   | 68 (7)                  | 62                        | 0                        |
| <i>P. (Ci.) acidus</i>       | Vientiane    | 200 (2)                | 6                             | 0                   | n. a.                   | n. a.                     | n. a.                    |
| <i>P. (Em.) emblica</i>      | Ban Chomesy  | 111 (2)                | 6                             | 0                   | n. a.                   | n. a.                     | n. a.                    |
| <i>P. (Pd.) roseus</i>       | Phialat      | 53 (3)                 | 6                             | 0                   | 158 (3)                 | 120                       | 0                        |
| <i>P. marojejiensis</i>      | Mt. Marojeji | 49 (6)                 | 6.2 (6–8)                     | 77.8                | 116 (11)                | 59                        | 56                       |
| <i>P. humberitii</i>         | Mt. Marojeji | 27 (5)                 | 6                             | 88.9                | n. a.                   | n. a.                     | n. a.                    |
| <i>Reverchonia</i>           |              |                        |                               |                     |                         |                           |                          |
| <i>R. arenaria</i>           | New Mexico   | 266 (18)               | 6                             | 0                   | n. a.                   | n. a.                     | n. a.                    |
| <i>Breynia</i>               |              |                        |                               |                     |                         |                           |                          |
| <i>B. retusa</i>             | Vientiane    | 138 (4)                | 6                             | 0                   | 226 (4)                 | 112                       | 0                        |
| <i>Sauropus</i>              |              |                        |                               |                     |                         |                           |                          |
| <i>S. quadrangularis</i>     | Vientiane    | 43 (11)                | 6                             | 0                   | 128 (13)                | 73                        | 0                        |
| <i>S. brevipes</i>           | Vientiane    | 19 (8)                 | 6                             | 0                   | 88 (11)                 | 37                        | 0                        |
| <i>S. androgynus</i>         | Thakhaek     | 78 (6)                 | 6                             | 0                   | 70 (6)                  | 34                        | 0                        |
| <i>S. granulosus</i>         | Vientiane    | n. a.                  | n. a.                         | n. a.               | 25 (5)                  | 15                        | 0                        |

<sup>†</sup>Mean and range in parentheses for species with variable ovule number.

**Table S2. Associations between pollination and presence/absence of *Epicephala* eggs in female flowers.**

| Species                          |               | No eggs | With eggs | Significance <sup>†</sup> |
|----------------------------------|---------------|---------|-----------|---------------------------|
| Locality (No. of plants)         |               |         |           |                           |
| <i>Flueggea suffruticosa</i>     |               |         |           |                           |
| Hyogo (2)                        | Pollinated    | 329     | 50        | $P = 1$                   |
|                                  | Un-pollinated | 0       | 0         |                           |
| Hiroshima (8)                    | Pollinated    | 342     | 23        | $P = 0.1735$              |
|                                  | Un-pollinated | 28      | 0         |                           |
| <i>Phyllanthus reticulatus</i>   |               |         |           |                           |
| Henchun (3)                      | Pollinated    | 13      | 107       | $P < 0.0001$              |
|                                  | Un-pollinated | 131     | 0         |                           |
| <i>Phyllanthus</i> sp.           |               |         |           |                           |
| Laksao (2)                       | Pollinated    | 3       | 51        | $P < 0.0001$              |
|                                  | Un-pollinated | 116     | 0         |                           |
| <i>Phyllanthus marojejiensis</i> |               |         |           |                           |
| Mt. Marojeji (11)                | Pollinated    | 3       | 56        | $P < 0.0001$              |
|                                  | Un-pollinated | 57      | 0         |                           |

<sup>†</sup>Significance of association between pollination and egg presence assessed by Fisher's exact test.

**Table S3. Flower visitors of Phyllanthaeae plants**

| Genus<br>Species          | Study site | Hours observed |                                    | Insect species                  | Family: order <sup>†</sup> | Visitation rate <sup>§</sup> | Pollen attachment <sup>‡</sup> |
|---------------------------|------------|----------------|------------------------------------|---------------------------------|----------------------------|------------------------------|--------------------------------|
|                           |            | Day            | Night                              |                                 |                            |                              |                                |
| <i>Flueggea</i>           |            |                |                                    |                                 |                            |                              |                                |
| <i>F. suffruticosa</i>    | Hyogo      | 0.2            | 11.0                               | <i>Adoretus tenuimaculatus</i>  | Sca: Col                   | 5.0                          | ++                             |
|                           |            |                |                                    | <i>Eucetonia roelofsi</i>       | Sca: Col                   | 5.0                          | +++                            |
|                           |            |                |                                    | <i>Betasyrphus serarius</i>     | Syr: Dip                   | 5.0                          | +++                            |
|                           |            |                |                                    | <i>Phytomya zonata</i>          | Syr: Dip                   | 5.0                          | +++                            |
|                           |            |                |                                    | <i>Sphaerophoria philanthus</i> | Syr: Dip                   | 25.0                         | +++                            |
|                           |            |                |                                    | <i>Odontomyia garatas</i>       | Str: Dip                   | 5.0                          | +++                            |
|                           |            |                |                                    | <i>Stomorhina obsoleta</i>      | Cal: Dip                   | 130.0                        | +++                            |
|                           |            |                |                                    | <i>Phasia crassipennis</i>      | Pha: Dip                   | 5.0                          | +++                            |
|                           |            |                |                                    | <i>Lasioglossum</i> sp. 1       | Hal: Hym                   | 10.0                         | +++                            |
|                           |            |                |                                    | <i>Lasioglossum</i> sp. 2       | Hal: Hym                   | 45.0                         | +++                            |
|                           |            |                |                                    | <i>Lasioglossum</i> sp. 3       | Hal: Hym                   | 70.0                         | +++                            |
|                           |            |                |                                    | <i>Apis cerana</i>              | Api: Hym                   | 65.0                         | +++                            |
|                           |            |                |                                    | <i>Epicephala</i> sp. 1         | Gra: Lep                   | 3.5                          |                                |
|                           |            |                |                                    | <i>F. suffruticosa</i>          | Amami Is.                  | 0.3                          | <i>Stomorhina obsoleta</i>     |
| <i>Ophyra</i> sp.         | Ant: Dip   | 3.3            | +                                  |                                 |                            |                              |                                |
| <i>Homoneura</i> sp.      | Lau: Dip   | 3.3            | +++                                |                                 |                            |                              |                                |
| <i>Polistes jokahamae</i> | Ves: Hym   | 6.7            | +++                                |                                 |                            |                              |                                |
| <i>Lasioglossum</i> sp. 4 | Hal: Hym   | 16.7           | +++                                |                                 |                            |                              |                                |
| <i>F. virosa</i>          | Fangliao   | 0.3            | <i>Eristalinus quinquestriatus</i> | Syr: Dip                        | 6.7                        | +++                          |                                |
|                           |            |                | <i>Ischiodon scutellaris</i>       | Syr: Dip                        | 6.7                        | ++                           |                                |
|                           |            |                | <i>Paragus</i> sp.                 | Syr: Dip                        | 10.0                       | ++                           |                                |
|                           |            |                | <i>Stomorhina obsoleta</i>         | Cal: Dip                        | 50.0                       | +++                          |                                |
|                           |            |                | <i>Chrysomya</i> sp. 1             | Cal: Dip                        | 3.3                        | +++                          |                                |
|                           |            |                | <i>Chrysomya</i> sp. 2             | Cal: Dip                        | 10.0                       | +++                          |                                |
|                           |            |                | <i>Polleniopsis</i> sp.            | Cal: Dip                        | 6.7                        | +++                          |                                |
|                           |            |                | <i>Parasarcophaga</i> sp.          | Sar: Dip                        | 10.0                       | +++                          |                                |
|                           |            |                | <i>Siphona</i> sp.                 | Tac: Dip                        | 20.0                       | +++                          |                                |
|                           |            |                | <i>Braunsapis</i> sp.              | Api: Hym                        | 3.3                        | +++                          |                                |
|                           |            |                | <i>Apis cerana</i>                 | Api: Hym                        | 20.0                       | +++                          |                                |
|                           |            |                | <i>Apis mellifera</i>              | Api: Hym                        | 16.7                       | +++                          |                                |
|                           |            |                | <i>Amata</i> sp.                   | Arc: Lep                        | 3.3                        | +++                          |                                |
|                           |            |                | <i>Princeps demoleus</i>           | Pap: Lep                        | 3.3                        | +++                          |                                |
|                           |            |                | <i>Eurema hecabe</i>               | Pie: Lep                        | 3.3                        | +                            |                                |
|                           |            |                | <i>Precis lemonias</i>             | Nym: Lep                        | 3.3                        | +                            |                                |
|                           |            |                | <i>Precis iphita</i>               | Nym: Lep                        | 3.3                        | +++                          |                                |

|                              |              |     |     |                                          |          |      |  |     |
|------------------------------|--------------|-----|-----|------------------------------------------|----------|------|--|-----|
|                              |              |     |     | <i>Hypolimnas misippus</i>               | Nym: Lep | 3.3  |  | +   |
| <i>Phyllanthus</i>           |              |     |     |                                          |          |      |  |     |
| <i>P. (Is.) ussuriensis</i>  | Kyoto        | 1.0 |     | <i>Tetramorium</i> sp. 1                 | For: Hym | 5.0  |  | +   |
|                              |              |     |     | <i>Tetramorium</i> sp. 2                 | For: Hym | 2.0  |  |     |
| <i>P. (Is.) virgatus</i>     | Vientiane    | 0.3 |     | <i>Paragus</i> sp.                       | Syr: Dip | 6.7  |  | ++  |
|                              |              |     |     | <i>Camponotus</i> sp.                    | For: Hym | 13.3 |  | +   |
|                              |              |     |     | <i>Solenopsis</i> sp.                    | For: Hym | 10.0 |  | +   |
| <i>P. (Ki.) flexuosus</i>    | Kyoto        | 8.0 |     | <i>Pidonia puziloi</i>                   | Cer: Col | 0.5  |  | +++ |
|                              |              |     |     | <i>Pidonia simillima</i>                 | Cer: Col | 0.3  |  | +++ |
|                              |              |     |     | <i>Ezonacerda</i> sp.                    | Oed: Col | 0.1  |  | +++ |
|                              |              |     |     | sp.                                      | Cec: Dip | 2.4  |  | ++  |
|                              |              |     |     | <i>Rhamphomyia formidabilis</i>          | Emp: Dip | 0.3  |  | ++  |
|                              |              |     |     | <i>Episyrphus balteatus</i>              | Syr: Dip | 0.1  |  | +++ |
|                              |              |     |     | <i>Sphegina</i> sp.                      | Syr: Dip | 0.1  |  | +++ |
|                              |              |     |     | <i>Graptomyza itoi</i>                   | Syr: Dip | 0.1  |  | ++  |
|                              |              |     |     | <i>Phorticella</i> sp.                   | Dro: Dip | 0.1  |  | ++  |
|                              |              |     |     | <i>Spilichneumon nonagriæ</i>            | Ich: Hym | 0.1  |  | +   |
| <i>P. (Ki.) oligospermus</i> | Yonaguni Is. | 3.0 |     | <i>Episyrphus</i> sp.                    | Syr: Dip | 0.7  |  | ++  |
|                              |              |     |     | <i>Chrysomya</i> sp. 3                   | Cal: Dip | 0.3  |  | +++ |
|                              |              |     |     | <i>Rhinia zanthogaster</i>               | Cal: Dip | 0.3  |  | +   |
|                              |              |     |     | <i>Lasioglossum</i> sp. 5                | Hal: Hym | 0.3  |  | +++ |
| <i>P. (Ki.) reticulatus</i>  | Henchun      | 5.0 | 7.0 | <i>Epicephala</i> sp. 2                  | Gra: Lep | 2.9  |  | +++ |
| <i>P. (Ki.) tenellus</i>     | Okinawa Is.  | 0.5 |     | —                                        |          |      |  |     |
| <i>P. (Ph.) lepidocarpus</i> | Kyoto        | 0.5 |     | <i>Formica japonica</i>                  | For: Hym | 22.0 |  | +++ |
|                              |              |     |     | <i>Formica</i> sp.                       | For: Hym | 24.0 |  | ++  |
|                              | Miyako Is.   | 0.3 | 2.0 | <i>Tetramorium</i> sp. 3                 | For: Hym | 24.0 |  | ++  |
|                              |              |     |     | <i>Anoplolepis gracilipes</i>            | For: Hym | 3.3  |  | +   |
|                              |              |     |     | <i>Epicephala</i> sp. 3 (on young fruit) | Gra: Lep | 6.5  |  |     |
|                              | Ishigaki Is. | 0.3 |     | <i>Technomyrmex</i> sp.                  | For: Hym | 10.0 |  | ++  |
|                              |              |     |     | <i>Tapinoma</i> sp.                      | For: Hym | 10.0 |  | ++  |
|                              |              |     |     | <i>Tetramorium</i> sp. 4                 | For: Hym | 26.7 |  | ++  |
| <i>P. (Ph.) amarus</i>       | Ishigaki Is. | 0.3 |     | <i>Monomorium</i> sp. 1                  | For: Hym | 20.0 |  | ++  |
|                              | Thakhaek     |     | 1.5 | <i>Epicephala</i> sp. 4 (on young fruit) | Gra: Lep | 4.0  |  |     |
| <i>P. (Ph.) debilis</i>      | Ishigaki Is. | 0.3 |     | <i>Monomorium</i> sp. 2                  | For: Hym | 16.7 |  | ++  |
| <i>P. (Ph.) liukuensis</i>   | Okinawa Is.  | 3.0 |     | <i>Mallochohelea</i> sp.                 | Crt: Dip | 0.7  |  | +   |
| <i>P. (Pd.) roseus</i>       | Phialat      | 2.0 |     | sp.                                      | Cur: Col | 0.5  |  | ++  |
|                              |              |     |     | <i>Stomorhina obsoleta</i>               | Cal: Dip | 2.5  |  | +++ |
|                              |              |     |     | sp.                                      | Lau: Dip | 0.5  |  | ++  |
| <i>P. marojejiensis</i>      | Mt. Marojeji | 4.0 | 4.0 | <i>Epicephala</i> sp. 5 (on leaf)        | Gra: Lep | 0.3  |  | +++ |

|                          |            |     |                              |          |     |     |  |
|--------------------------|------------|-----|------------------------------|----------|-----|-----|--|
| <i>Reverchonia</i>       |            |     |                              |          |     |     |  |
| <i>R. arenaria</i>       | New Mexico | 3.0 | sp.                          | Bru: Col | 0.3 |     |  |
|                          |            |     | <i>Sphixapata trilineata</i> | Sar: Dip | 1.0 | +   |  |
|                          |            |     | <i>Lasioglossum</i> sp. 6    | Hal: Hym | 0.3 | +   |  |
| <i>Breynia</i>           |            |     |                              |          |     |     |  |
| <i>B. retusa</i>         | Vientiane  | 2.0 | <i>Clinodiplosis</i> sp.     | Cec: Dip | 4.5 | ++  |  |
| <i>Sauropus</i>          |            |     |                              |          |     |     |  |
| <i>S. quadrangularis</i> | Vientiane  | 8.0 | <i>Paragus</i> sp.           | Syr: Dip | 0.5 | +++ |  |
| <i>S. brevipes</i>       | Vientiane  | 4.0 | —                            |          |     |     |  |
| <i>S. androgynus</i>     | Thakhaek   | 1.0 | —                            |          |     |     |  |
| <i>S. granulosis</i>     | Vientiane  | 2.0 | <i>Halictus</i> sp.          | Hal: Hym | 0.5 | +++ |  |

<sup>†</sup>Abbreviations for family and order names: Ant, Anthomyiidae; Api, Apidae; Arc, Arctiidae; Bru, Bruchidae; Cal, Calliphoridae; Cec, Cecidomyiidae; Cer, Cerambycidae; Crt, Ceratopogonidae; Coc, Coccinellidae; Cur, Curculionidae; Dro, Drosophilidae; Emp, Empididae; For, Formicidae; Gra, Gracillariidae; Hal, Halictidae; Ich, Ichneumonidae; Lau, Lauxaniidae; Mus, Muscidae; Nit, Nitidulidae; Nym, Nymphalidae; Oed, Oedemeridae; Pap, Papilionidae; Pha, Phasiidae; Pie, Pieridae; Pla, Plataspidae; Sar, Sarcophagidae; Sca, Scarabaeidae; Str, Stratiomyidae; Syr, Syrphidae; Ves, Vespidae; Col, Coleoptera; Dip, Diptera; Hem, Hemiptera; Hym, Hymenoptera; Lep, Lepidoptera.

<sup>§</sup>Visitation rate is given as the number of individuals collected per plant per hour for each insect species.

<sup>‡</sup>Amount of pollen load is assessed as: +, <10 grains; ++, 10–99 grains; +++, ≥100 grains.

**Table S4. List of *matK* primers**

| Primer name <sup>†</sup> | Strand | Sequence (5' to 3')    |
|--------------------------|--------|------------------------|
| phy-matk1                | F      | CTTHTNNTTTCGGGARTATATT |
| phy-matk6                | F      | TAAARCGTTTAATTACTIONCG |
| phy-matk3 <sup>§</sup>   | F      | GRTTYTTTCTTCACGAGTATTG |
| phy-matk4 <sup>§</sup>   | R      | CGAGRGAYTGYYTTCGATAATG |
| phy-matk2                | R      | ACAAAYAATATCMAAATACC   |

<sup>†</sup>Primers are located in this order from the 5'-end to the 3'-end.

<sup>§</sup>Used for sequencing only.

**Table S5. GenBank accession numbers for the plant sequences used in this study.**

|                                  | <i>matK</i> | <i>ndhF</i> | <i>atpB</i> | <i>PHYC</i> |
|----------------------------------|-------------|-------------|-------------|-------------|
| Ingroup                          |             |             |             |             |
| <i>Margaritaria discoidea</i>    | FJ235280    | FJ235490    | FJ235326    | FJ235372    |
| <i>Margaritaria indica</i>       | FJ235279    | FJ235489    | FJ235325    | FJ235371    |
| <i>Flueggea jullienii</i>        | FJ235278    | FJ235488    | FJ235324    | FJ235370    |
| <i>Flueggea suffruticosa</i>     | FJ235276    | FJ235486    | FJ235322    | FJ235368    |
| <i>Flueggea virosa</i>           | FJ235277    | FJ235487    | FJ235323    | FJ235369    |
| <i>Phyllanthus ussuriensis</i>   | FJ235274    | FJ235484    | FJ235320    | FJ235366    |
| <i>Phyllanthus virgatus</i>      | FJ235275    | FJ235485    | FJ235321    | FJ235367    |
| <i>Phyllanthus liukuensis</i>    | FJ235272    | FJ235482    | FJ235318    | FJ235364    |
| <i>Phyllanthus pulcheroides</i>  | FJ235273    | FJ235483    | FJ235319    | FJ235365    |
| <i>Phyllanthus reticulatus</i>   | FJ235270    | FJ235480    | FJ235316    | FJ235362    |
| <i>Phyllanthus</i> sp.           | FJ235271    | FJ235481    | FJ235317    | FJ235363    |
| <i>Phyllanthus flexuosus</i>     | FJ235269    | FJ235479    | FJ235315    | FJ235361    |
| <i>Phyllanthus oligospermus</i>  | FJ235268    | FJ235478    | FJ235314    | FJ235360    |
| <i>Phyllanthus tenellus</i>      | FJ235267    | FJ235477    | FJ235313    | FJ235359    |
| <i>Phyllanthus amarus</i>        | FJ235264    | FJ235474    | FJ235310    | FJ235356    |
| <i>Phyllanthus debilis</i>       | FJ235265    | FJ235475    | FJ235311    | FJ235357    |
| <i>Phyllanthus lepidocarpus</i>  | FJ235252    | FJ235462    | FJ235298    | FJ235344    |
| <i>Phyllanthus aeneus</i>        | FJ235260    | FJ235470    | FJ235306    | FJ235352    |
| <i>Phyllanthus gneissicus</i>    | FJ235262    | FJ235472    | FJ235308    | FJ235354    |
| <i>Phyllanthus guillauminii</i>  | FJ235263    | FJ235473    | FJ235309    | FJ235355    |
| <i>Phyllanthus vulcani</i>       | FJ235261    | FJ235471    | FJ235307    | FJ235353    |
| <i>Phyllanthus bourgeoisii</i>   | FJ235256    | FJ235466    | FJ235302    | FJ235348    |
| <i>Phyllanthus chamaecerasus</i> | FJ235255    | FJ235465    | FJ235301    | FJ235347    |
| <i>Phyllanthus caudatus</i>      | FJ235259    | FJ235469    | FJ235305    | FJ235351    |
| <i>Phyllanthus koniamboensis</i> | FJ235258    | FJ235468    | FJ235304    | FJ235350    |
| <i>Phyllanthus mangenotii</i>    | FJ235257    | FJ235467    | FJ235303    | FJ235349    |
| <i>Phyllanthus acidus</i>        | FJ235250    | FJ235460    | FJ235296    | FJ235342    |
| <i>Phyllanthus emblica</i>       | FJ235251    | FJ235461    | FJ235297    | FJ235343    |
| <i>Phyllanthus roseus</i>        | FJ235240    | FJ235450    | FJ235286    | FJ235332    |
| <i>Phyllanthus marojejiensis</i> | FJ235254    | FJ235464    | FJ235300    | FJ235346    |
| <i>Phyllanthus humbertii</i>     | FJ235253    | FJ235463    | FJ235299    | FJ235345    |
| <i>Reverchonia arenaria</i>      | FJ235266    | FJ235476    | FJ235312    | FJ235358    |
| <i>Sauropus androgynus</i>       | FJ235247    | FJ235457    | FJ235293    | FJ235339    |
| <i>Sauropus brevipes</i>         | FJ235248    | FJ235458    | FJ235294    | FJ235340    |
| <i>Sauropus granulatus</i>       | FJ235246    | FJ235456    | FJ235292    | FJ235338    |
| <i>Sauropus quadrangularis</i>   | FJ235249    | FJ235459    | FJ235295    | FJ235341    |
| <i>Breynia disticha</i>          | FJ235241    | FJ235451    | FJ235287    | FJ235333    |
| <i>Breynia fruticosa</i>         | FJ235245    | FJ235455    | FJ235291    | FJ235337    |
| <i>Breynia oblongifolia</i>      | FJ235242    | FJ235452    | FJ235288    | FJ235334    |
| <i>Breynia retusa</i>            | FJ235244    | FJ235454    | FJ235290    | FJ235336    |
| <i>Breynia vitis-idaea</i>       | FJ235243    | FJ235453    | FJ235289    | FJ235335    |
| <i>Glochidion acuminatum</i>     | FJ235239    | FJ235449    | FJ235285    | FJ235331    |
| <i>Glochidion lanceolatum</i>    | FJ235235    | FJ235445    | FJ235281    | FJ235327    |
| <i>Glochidion obovatum</i>       | FJ235238    | FJ235448    | FJ235284    | FJ235330    |
| <i>Glochidion rubrum</i>         | FJ235236    | FJ235446    | FJ235282    | FJ235328    |
| <i>Glochidion zeylanicum</i>     | FJ235237    | FJ235447    | FJ235283    | FJ235329    |
| Outgroup (Phyllanthaceae)        |             |             |             |             |
| <i>Actephila lindleyi</i>        | AY552415    |             | AY830190    | AY579830    |
| <i>Amanoa strobilacea</i>        | AY830258    | AY830289    | AY830191    | AY830365    |
| <i>Andrachne aspera</i>          | AY830259    | AY830290    | AY830192    | AY830366    |

|                                          |          |          |          |          |
|------------------------------------------|----------|----------|----------|----------|
| <i>Andrachne ovalis</i>                  | AY830260 | AY830291 | AY830193 | AY830367 |
| <i>Antidesma alexiteria</i>              | AY552416 | AY830292 | AY830194 | AY579832 |
| <i>Apodiscus chevalieri</i>              | AY552418 | AY830294 | AY830195 | AY579834 |
| <i>Aporosa frutescens</i>                | AY552417 | AY830295 | AY830196 | AY579835 |
| <i>Astrocasia neurocarpa</i>             | AY830261 | AY830296 | AY830197 | AY830368 |
| <i>Baccaurea javanica</i>                | AY579878 | AY830297 | AY830198 | AY579836 |
| <i>Baccaurea lanceolata</i>              | AY552419 | AY830298 | AY830199 | AY579837 |
| <i>Bischofia javanica</i>                | AY552420 | AY830299 | AY830200 | AY579838 |
| <i>Blotia leandriana</i>                 | AY552440 | AY830300 | AY830201 | AY579862 |
| <i>Bridelia ferruginea</i>               | AY830262 | AY830303 | AY830204 | AY830370 |
| <i>Bridelia insulana</i>                 | AY830263 | AY830304 | AY830295 |          |
| <i>Bridelia retusa</i>                   | AY552421 | AY830305 | AY830206 | AY579841 |
| <i>Cleistanthus oblongifolius</i>        | AY552424 | AY830307 |          | AY579843 |
| <i>Cleistanthus perrieri</i>             | AY552425 | AY830308 | AY830207 | AY579842 |
| <i>Cleistanthus suarezensis</i>          | AY830265 | AY830309 | AY830208 |          |
| <i>Croizatia brevipetiolata</i>          |          | AY830310 | AY788213 | AY830371 |
| <i>Discocarpus essequaboensis</i>        | AY830267 | AY830312 | AY830209 |          |
| <i>Gonatogyne brasiliensis</i>           | AY552429 | AY830316 | AY830213 | AY579850 |
| <i>Heywoodia lucens</i>                  | AY552430 | AY830317 | AY830214 | AY579851 |
| <i>Hieronyma oblonga</i>                 | AY830268 | AY830318 | AY830215 |          |
| <i>Hymenocardia acida</i>                | AY830269 | AY830319 | AY830216 | AY830373 |
| <i>Lachnostylis bilocularis</i>          | AY552431 | AY830321 | AY830218 | AY579854 |
| <i>Leptopus colchicus</i>                | AY552434 | AY830322 | AY830220 | AY579856 |
| <i>Leptopus cordifolius</i>              | AY552433 | AY830323 | AY830219 | AY579855 |
| <i>Leptopus diplopermus</i>              | AY830271 | AY830325 | AY830221 |          |
| <i>Maesobotrya vermeulenii</i>           | AY830273 | AY830327 | AY830224 |          |
| <i>Martretia quadricornis</i>            | AY830275 | AY830331 | AY830228 | AY830377 |
| <i>Meineckia phyllanthoides</i>          | AY552436 | AY830332 | AY830229 | AY579857 |
| <i>Petalodiscus bojerianus</i>           | AY552439 | AY830351 | AY830247 | AY579860 |
| <i>Petalodiscus fadenii</i>              | AY552437 | AY830334 | AY830231 | AY579859 |
| <i>Petalodiscus platyrachis</i>          | AY552441 | AY830335 | AY830232 | AY579861 |
| <i>Poranthera corymbosa</i>              | AY552447 |          | AY830239 | AY579870 |
| <i>Poranthera microphylla</i>            |          | AY830342 | AY830240 | AY830379 |
| <i>Pseudolachnostylis maprouneifolia</i> | AY552448 | AY830344 | AY830241 | AY579871 |
| <i>Savia dictyocarpa</i>                 | AY552449 | AY830352 | AY830248 | AY579873 |
| <i>Securinea durissima</i>               | AY830285 | AY830353 | AY830249 | AY830382 |
| <i>Spondianthus preussii</i>             | AY830286 | AY830354 | AY830250 | AY830383 |
| <i>Thecacoris madagascariensis</i>       | AY552452 | AY830355 | AY830251 | AY579874 |
| <i>Uapaca guineensis</i>                 | AY830287 | AY830356 | AY830390 | AY830385 |
| <i>Uapaca littoralis</i>                 | AY830288 | AY830357 | AY830252 | AY830384 |
| <i>Wielandia elegans</i>                 | AY552454 | AY830358 | AY830253 | AY579875 |
| <i>Zimmermannia capillipes</i>           | AY552455 | AY830359 | AY830254 | AY579876 |
| <i>Zimmermanniopsis uzungwaensis</i>     | AY552456 | AY830360 | AY830255 | AY579877 |
| Outgroup (Picrodendraceae)               |          |          |          |          |
| <i>Androstachys johnsonii</i>            | AY552461 | AY830361 | AF209527 | AY579831 |
| <i>Hyaenanche globosa</i>                | AY552462 | AY830363 |          | AY579852 |
| Outgroup (Putranjivaceae)                |          |          |          |          |
| <i>Drypetes madagascariensis</i>         | AY552458 | AY830362 | AY830256 | AY579845 |
| <i>Putranjiva zeylanica</i>              | AY552459 | AY830364 | AY830257 | AY830386 |



**Table S6. GenBank accession numbers for the moth sequences used in this study.**

|                                            | COI      | ArgK     | EF-1a    | Wg       | 18S rDNA |
|--------------------------------------------|----------|----------|----------|----------|----------|
| Ingroup ( <i>Epicephala</i> )              |          |          |          |          |          |
| <i>E. sp. ex Flueggea suffruticosa</i>     | FJ235373 | FJ235392 | FJ235491 | FJ235206 | FJ235416 |
| <i>E. sp. ex Phyllanthus ussuriensis</i>   | FJ235387 | FJ235411 | FJ235510 | FJ235225 | FJ235435 |
| <i>E. sp. ex Phyllanthus reticulatus</i>   | FJ235383 | FJ235407 | FJ235506 | FJ235221 | FJ235431 |
| <i>E. sp. ex Phyllanthus sp.</i>           | FJ235382 | FJ235406 | FJ235505 | FJ235220 | FJ235430 |
| <i>E. sp. ex Phyllanthus amarus</i>        | FJ235388 | FJ235412 | FJ235511 | FJ235226 | FJ235436 |
| <i>E. sp. ex Phyllanthus lepidocarpus</i>  | FJ235386 | FJ235410 | FJ235509 | FJ235224 | FJ235434 |
| <i>E. sp. ex Phyllanthus aeneus</i>        | AY269393 | FJ235401 | FJ235500 | FJ235215 | FJ235425 |
| <i>E. sp. ex Phyllanthus gneissicus</i>    | FJ235376 | FJ235398 | FJ235497 | FJ235212 | FJ235422 |
| <i>E. sp. ex Phyllanthus guillauminii</i>  | AY269399 | FJ235399 | FJ235498 | FJ235213 | FJ235423 |
| <i>E. sp. ex Phyllanthus vulcani</i>       | FJ235377 | FJ235400 | FJ235499 | FJ235214 | FJ235424 |
| <i>E. sp. ex Phyllanthus bourgeoisii</i>   | AY269404 | FJ235395 | FJ235494 | FJ235209 | FJ235419 |
| <i>E. sp. ex Phyllanthus chamaecerasus</i> | AY269411 | FJ235397 | FJ235496 | FJ235211 | FJ235421 |
| <i>E. sp. ex Phyllanthus caudatus</i>      | FJ235375 | FJ235396 | FJ235495 | FJ235210 | FJ235420 |
| <i>E. sp. ex Phyllanthus koniamboensis</i> | FJ235374 | FJ235394 | FJ235493 | FJ235208 | FJ235418 |
| <i>E. sp. ex Phyllanthus mangenotii</i>    | AY269397 | FJ235393 | FJ235492 | FJ235207 | FJ235417 |
| <i>E. sp. ex Phyllanthus marojejiensis</i> | FJ235378 | FJ235402 | FJ235501 | FJ235216 | FJ235426 |
| <i>E. sp. ex Phyllanthus humbertii</i>     | FJ235379 | FJ235403 | FJ235502 | FJ235217 | FJ235427 |
| <i>E. sp. ex Breynia disticha</i>          | FJ235381 | FJ235405 | FJ235504 | FJ235219 | FJ235429 |
| <i>E. sp. ex Breynia fruticosa</i>         | FJ235380 | FJ235404 | FJ235503 | FJ235218 | FJ235428 |
| <i>E. sp. ex Breynia oblongifolia</i>      | FJ235384 | FJ235408 | FJ235507 | FJ235222 | FJ235432 |
| <i>E. sp. ex Breynia vitis-idaea</i>       | FJ235385 | FJ235409 | FJ235508 | FJ235223 | FJ235433 |
| <i>E. sp. ex Glochidion acuminatum</i>     | DQ298955 | DQ298844 | DQ299051 | FJ235229 | FJ235439 |
| <i>E. sp. ex Glochidion lanceolatum</i>    | DQ298967 | DQ298858 | DQ299065 | FJ235227 | FJ235437 |
| <i>E. sp. ex Glochidion obovatum</i>       | DQ299009 | DQ298903 | DQ299110 | FJ235230 | FJ235440 |
| <i>E. sp. ex Glochidion rubrum</i>         | DQ299027 | DQ298924 | DQ299131 | FJ235228 | FJ235438 |
| <i>E. sp. ex Glochidion zeylanicum</i>     | DQ299039 | DQ298937 | DQ299144 | FJ235231 | FJ235441 |
| Outgroup                                   |          |          |          |          |          |
| <i>Cuphodes diospyrosella</i>              | FJ235389 | FJ235413 | FJ235512 | FJ235232 | FJ235442 |
| <i>Stomphastis labyrinthica</i>            | FJ235390 | FJ235414 | FJ235513 | FJ235233 | FJ235443 |
| <i>Melanocercops ficuvorella</i>           | FJ235391 | FJ235415 | FJ235514 | FJ235234 | FJ235444 |

**Table S7. Phyllanthaceae fossil records. Fossils indicated in bold were used to constrain node ages in the dating analysis.**

| Extant taxon              | Fossil taxon                            | Fossil type | Epoch, stage             | Age (mya) <sup>†</sup> | Location                        | Reference                          |
|---------------------------|-----------------------------------------|-------------|--------------------------|------------------------|---------------------------------|------------------------------------|
| <b><i>Glochidion</i></b>  | <b><i>Glochidion miocenica</i></b>      | Leaf        | Middle Miocene           | <b>11.6</b>            | Kathgodam, Uttar Pradesh, India | Prasad (1994)                      |
| <b><i>Glochidion</i></b>  | <b><i>Glochidion palaeohirsutum</i></b> | Leaf        | Middle Miocene           | <b>11.6</b>            | Darjeeling, West Bengal, India  | Antal and Prasad (1996)            |
| <i>Phyllanthus</i>        | <i>Phyllanthus wuhanensis</i>           | Wood        | Pliocene                 | 1.8                    | Wuhan, Hubei, China             | Yang et al. (1998)                 |
| <i>Phyllanthus</i>        | <i>Phyllanthus palaeoreticulatus</i>    | Leaf        | Miocene                  | 5.3                    | Suraikhola, Nepal               | Prasad and Awasthi (1996)          |
| <i>Phyllanthus</i>        | <i>Phyllanthus palaeoreticulatus</i>    | Leaf        | Miocene                  | 5.3                    | Tamil Nadu, India               | Agarwal (2002)                     |
| <i>Phyllanthus</i>        | <i>Phyllanthus securinegiformis</i>     | Seed        | Miocene                  | 5.3                    | Lower Lusatia, Germany          | Mai (1996)                         |
| <i>Phyllanthus</i>        | <i>Phyllanthus sexseminata</i>          | Seed        | Late Miocene, Tortonian  | 7.2                    | Gdow Bay, Poland                | Lancucka-Srodoniowa (1966)         |
| <i>Phyllanthus</i>        | <i>Phyllanthus mioreticulatus</i>       | Leaf        | Middle Miocene           | 11.6                   | Koilabas, Nepal                 | Prasad et al. (1999)               |
| <i>Phyllanthus</i>        | <i>Phyllanthus koilabesensis</i>        | Leaf        | Middle Miocene           | 11.6                   | Koilabas, Nepal                 | Prasad et al. (1999)               |
| <i>Phyllanthus</i>        | <i>Phyllanthus siwalica</i>             | Leaf        | Middle Miocene           | 11.6                   | Kathgodam, Uttar Pradesh, India | Prasad (1994)                      |
| <i>Phyllanthus</i>        | <i>Phyllanthus</i> type                 | Leaf        | Early Miocene            | 16.0                   | Mampui, Mizoram, India          | Agarwal and Mandaokar (2002)       |
| <i>Phyllanthus</i>        | <i>Phyllanthus kireevskiana</i>         | Seed        | Oligocene                | 23.0                   | Kireevsk, Russia                | Dorofeev (1960)                    |
| <i>Phyllanthus</i>        | <i>Phyllanthus triquetra</i>            | Seed        | Oligocene                | 23.0                   | Kozyulino, Tomsk, Russia        | Dorofeev (1959)                    |
| <i>Phyllanthus</i>        | <i>Phyllanthus compassica</i>           | Seed        | Late Oligocene, Chattian | 23.0                   | Rezhenka, Tomsk, Russia         | Dorofeev (1958)                    |
| <i>Phyllanthus</i>        | <i>Phyllanthus</i> type                 | Pollen      | Late Eocene              | 33.9                   | Cape Verde Rise, Atlantic Ocean | Zaklinskaja (1978)                 |
| <i>Phyllanthus</i>        | <i>Reverchonia</i> type                 | Pollen      | Late Eocene              | 33.9                   | Mont Pagnotte, Oise, France     | Gruas-Cavagnetto and Köhler (1992) |
| <b><i>Phyllanthus</i></b> | <b><i>Phyllanthus</i> type</b>          | Pollen      | Early Eocene             | <b>48.6</b>            | New Haven, East Sussex, UK      | Gruas-Cavagnetto and Köhler (1992) |
| <b>Poranthereae</b>       | <b><i>Actephila</i> type</b>            | Pollen      | Late Eocene              | <b>33.9</b>            | Celas, Gard, France             | Gruas-Cavagnetto and Köhler (1992) |
| <i>Bridelia</i>           | <i>Bridelia wuhanensis</i>              | Wood        | Pliocene                 | 1.8                    | Wuhan, Hubei, China             | Yang et al. (1998)                 |
| <i>Bischofia</i>          | <i>Bischofia polycarpa</i>              | Wood        | Pliocene                 | 1.8                    | Wuhan, Hubei, China             | Yang et al. (1998)                 |
| <i>Bischofia</i>          | <i>Bischofia javanoxyla</i>             | Wood        | Early Miocene            | 16.0                   | Kweishan, Taoyuan, Taiwan       | Li et al. (2003)                   |
| <b><i>Bischofia</i></b>   | <b><i>Bischofia</i> type</b>            | Pollen      | Middle Eocene, Bartonian | <b>37.2</b>            | Manche, France                  | Gruas-Cavagnetto and Köhler (1992) |

<sup>†</sup>Oldest reliable age of the fossil given as the upper boundary of each epoch/stage (geologic times based on Gradstein et al., 2004).

**Table S8. Results of selective exclusion experiments in *Phyllanthus lepidocarpus***

|                             | Plants | Flowers per plant | Fruit set <sup>†</sup> |
|-----------------------------|--------|-------------------|------------------------|
| Control                     | 15     | 20–32             | 99.4 <sup>a</sup>      |
| Bagged with fine mesh       | 15     | 26–38             | 0.0 <sup>b</sup>       |
| Only ants allowed to forage | 15     | 22–39             | 99.1 <sup>a</sup>      |
| Hand self-pollinated        | 5      | 15                | 100.0 <sup>a</sup>     |

<sup>†</sup>Fruit sets in the four treatments were significantly different (Kruskal-Wallis test,  $\chi^2 = 40.01$ ,  $df = 3$ ,  $P < 0.001$ ). Letters with different superscript letters indicate significant difference.

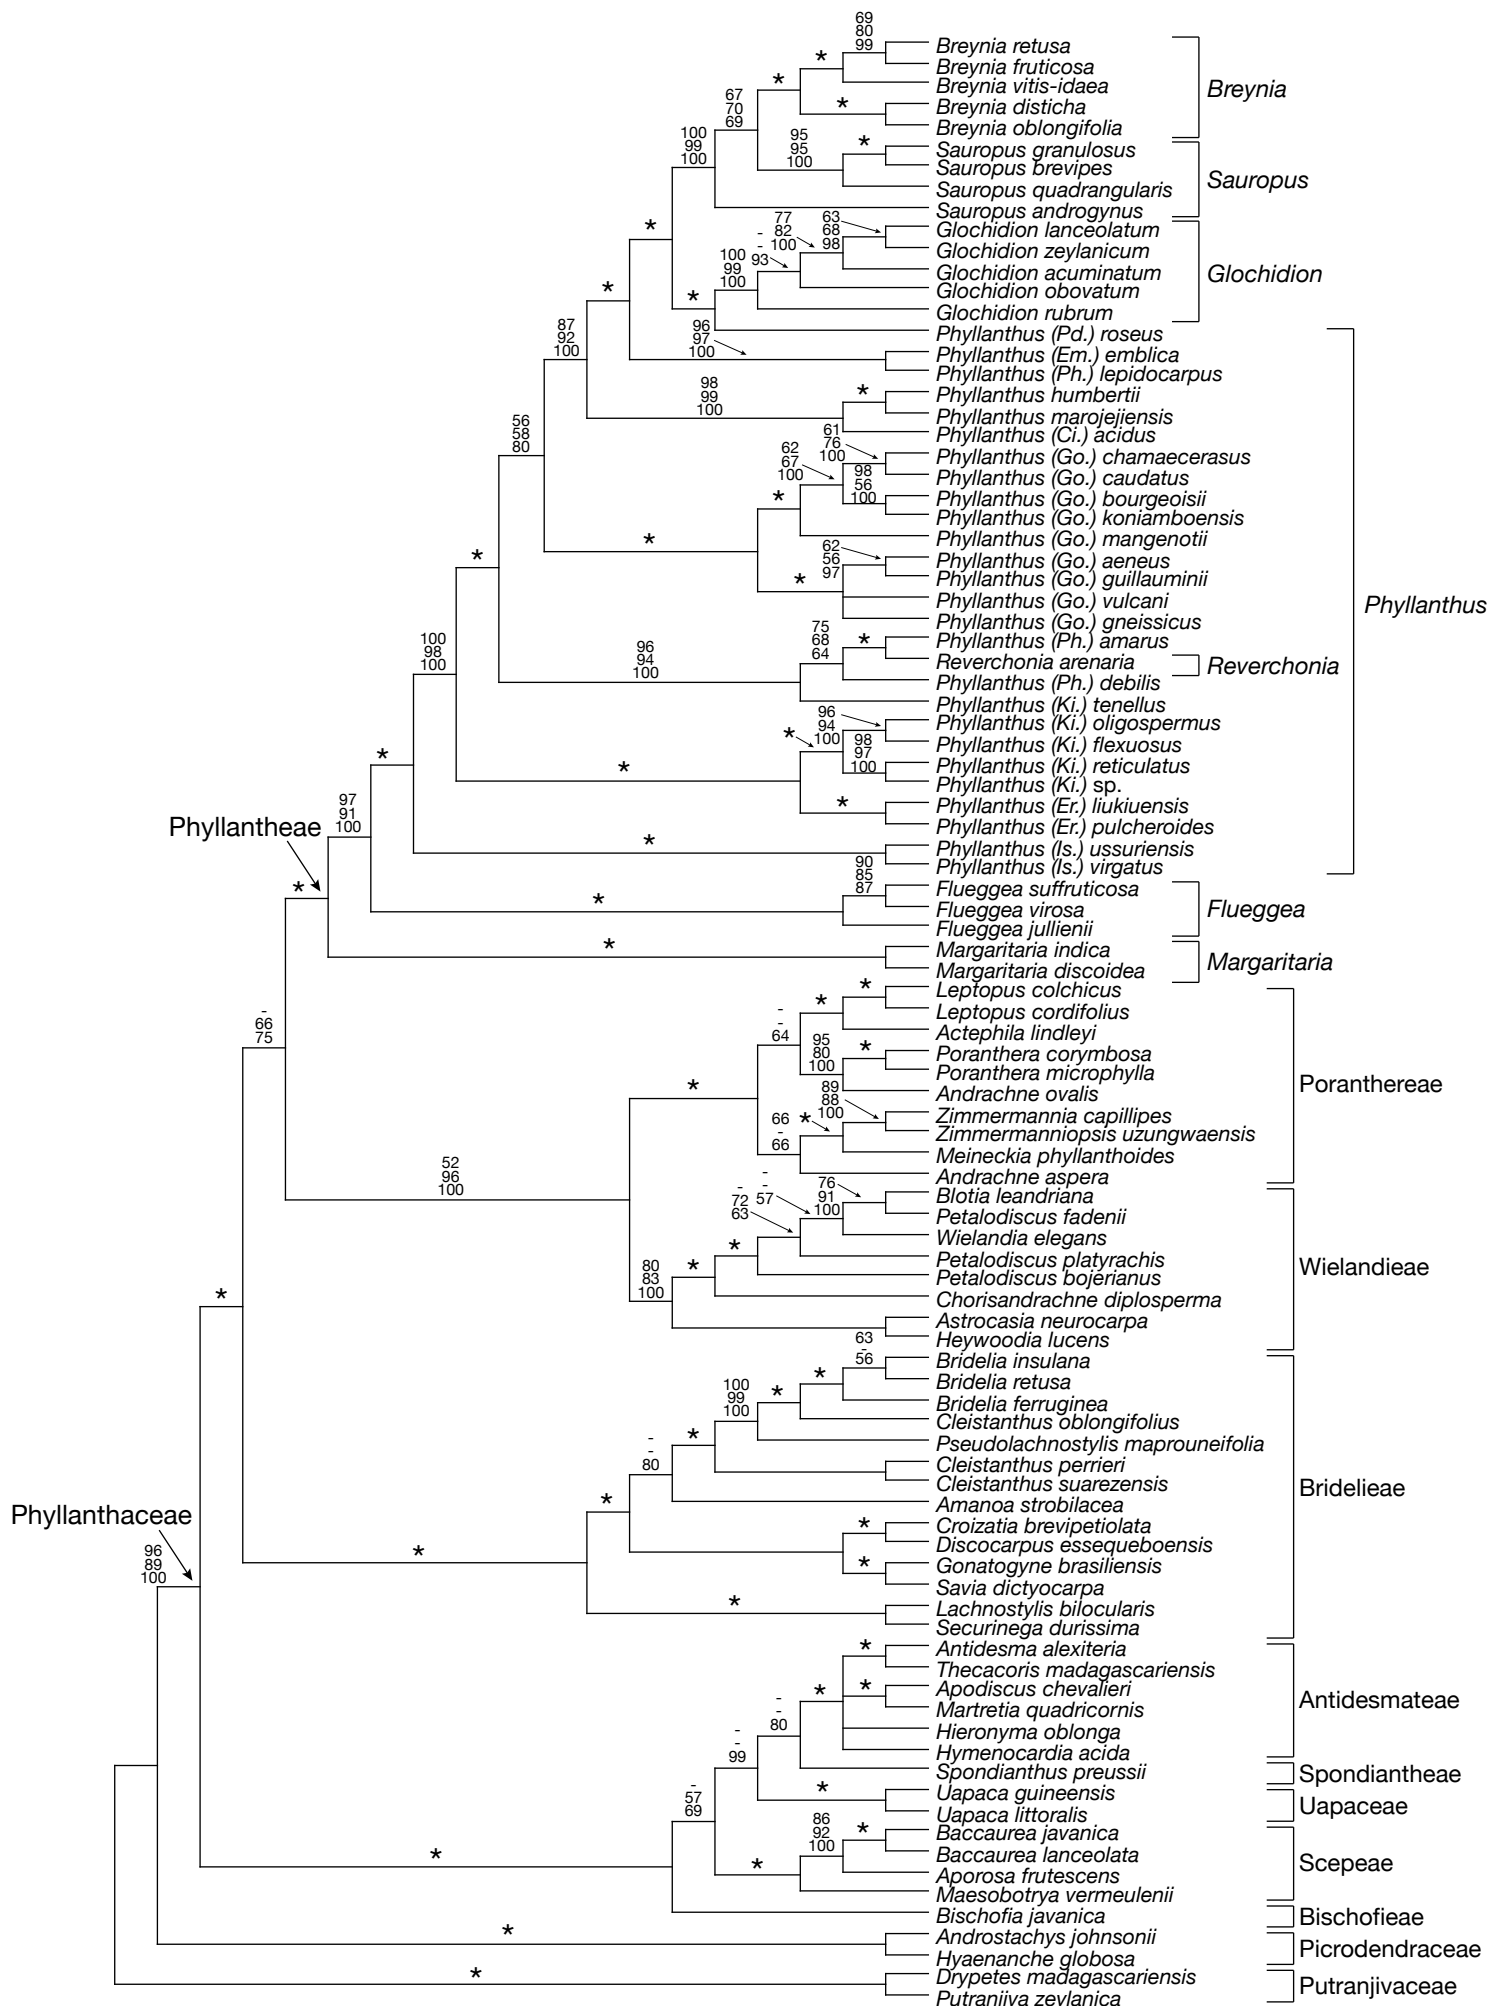

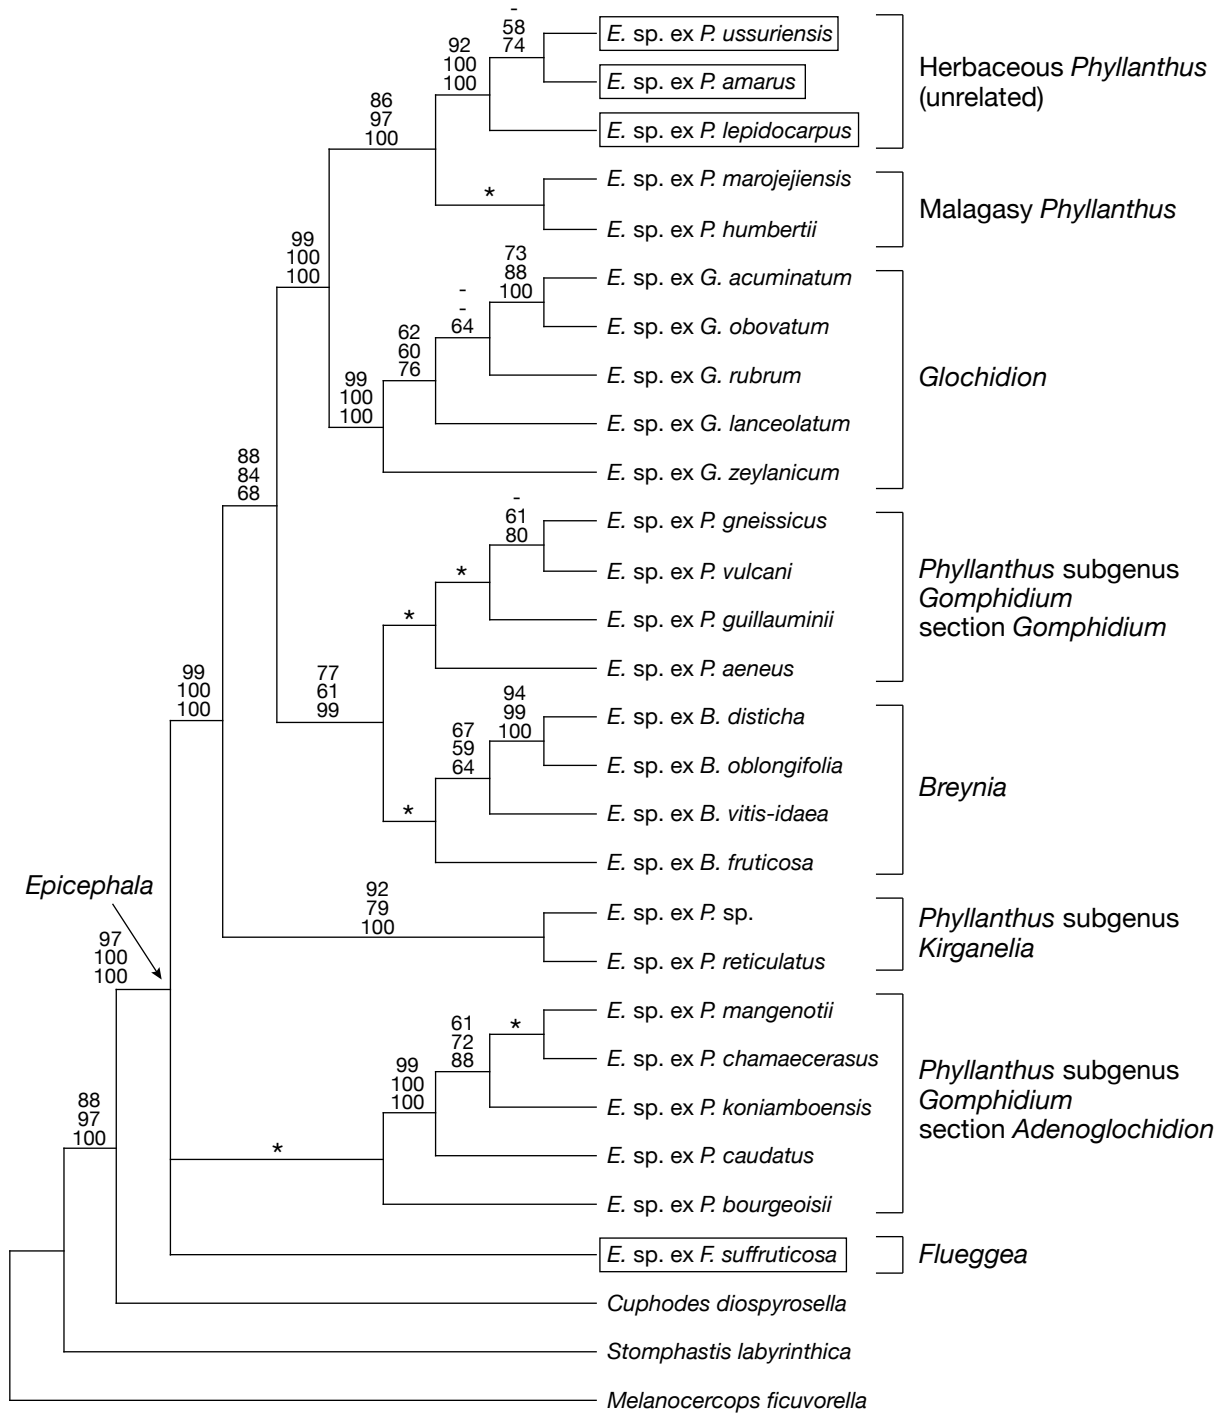

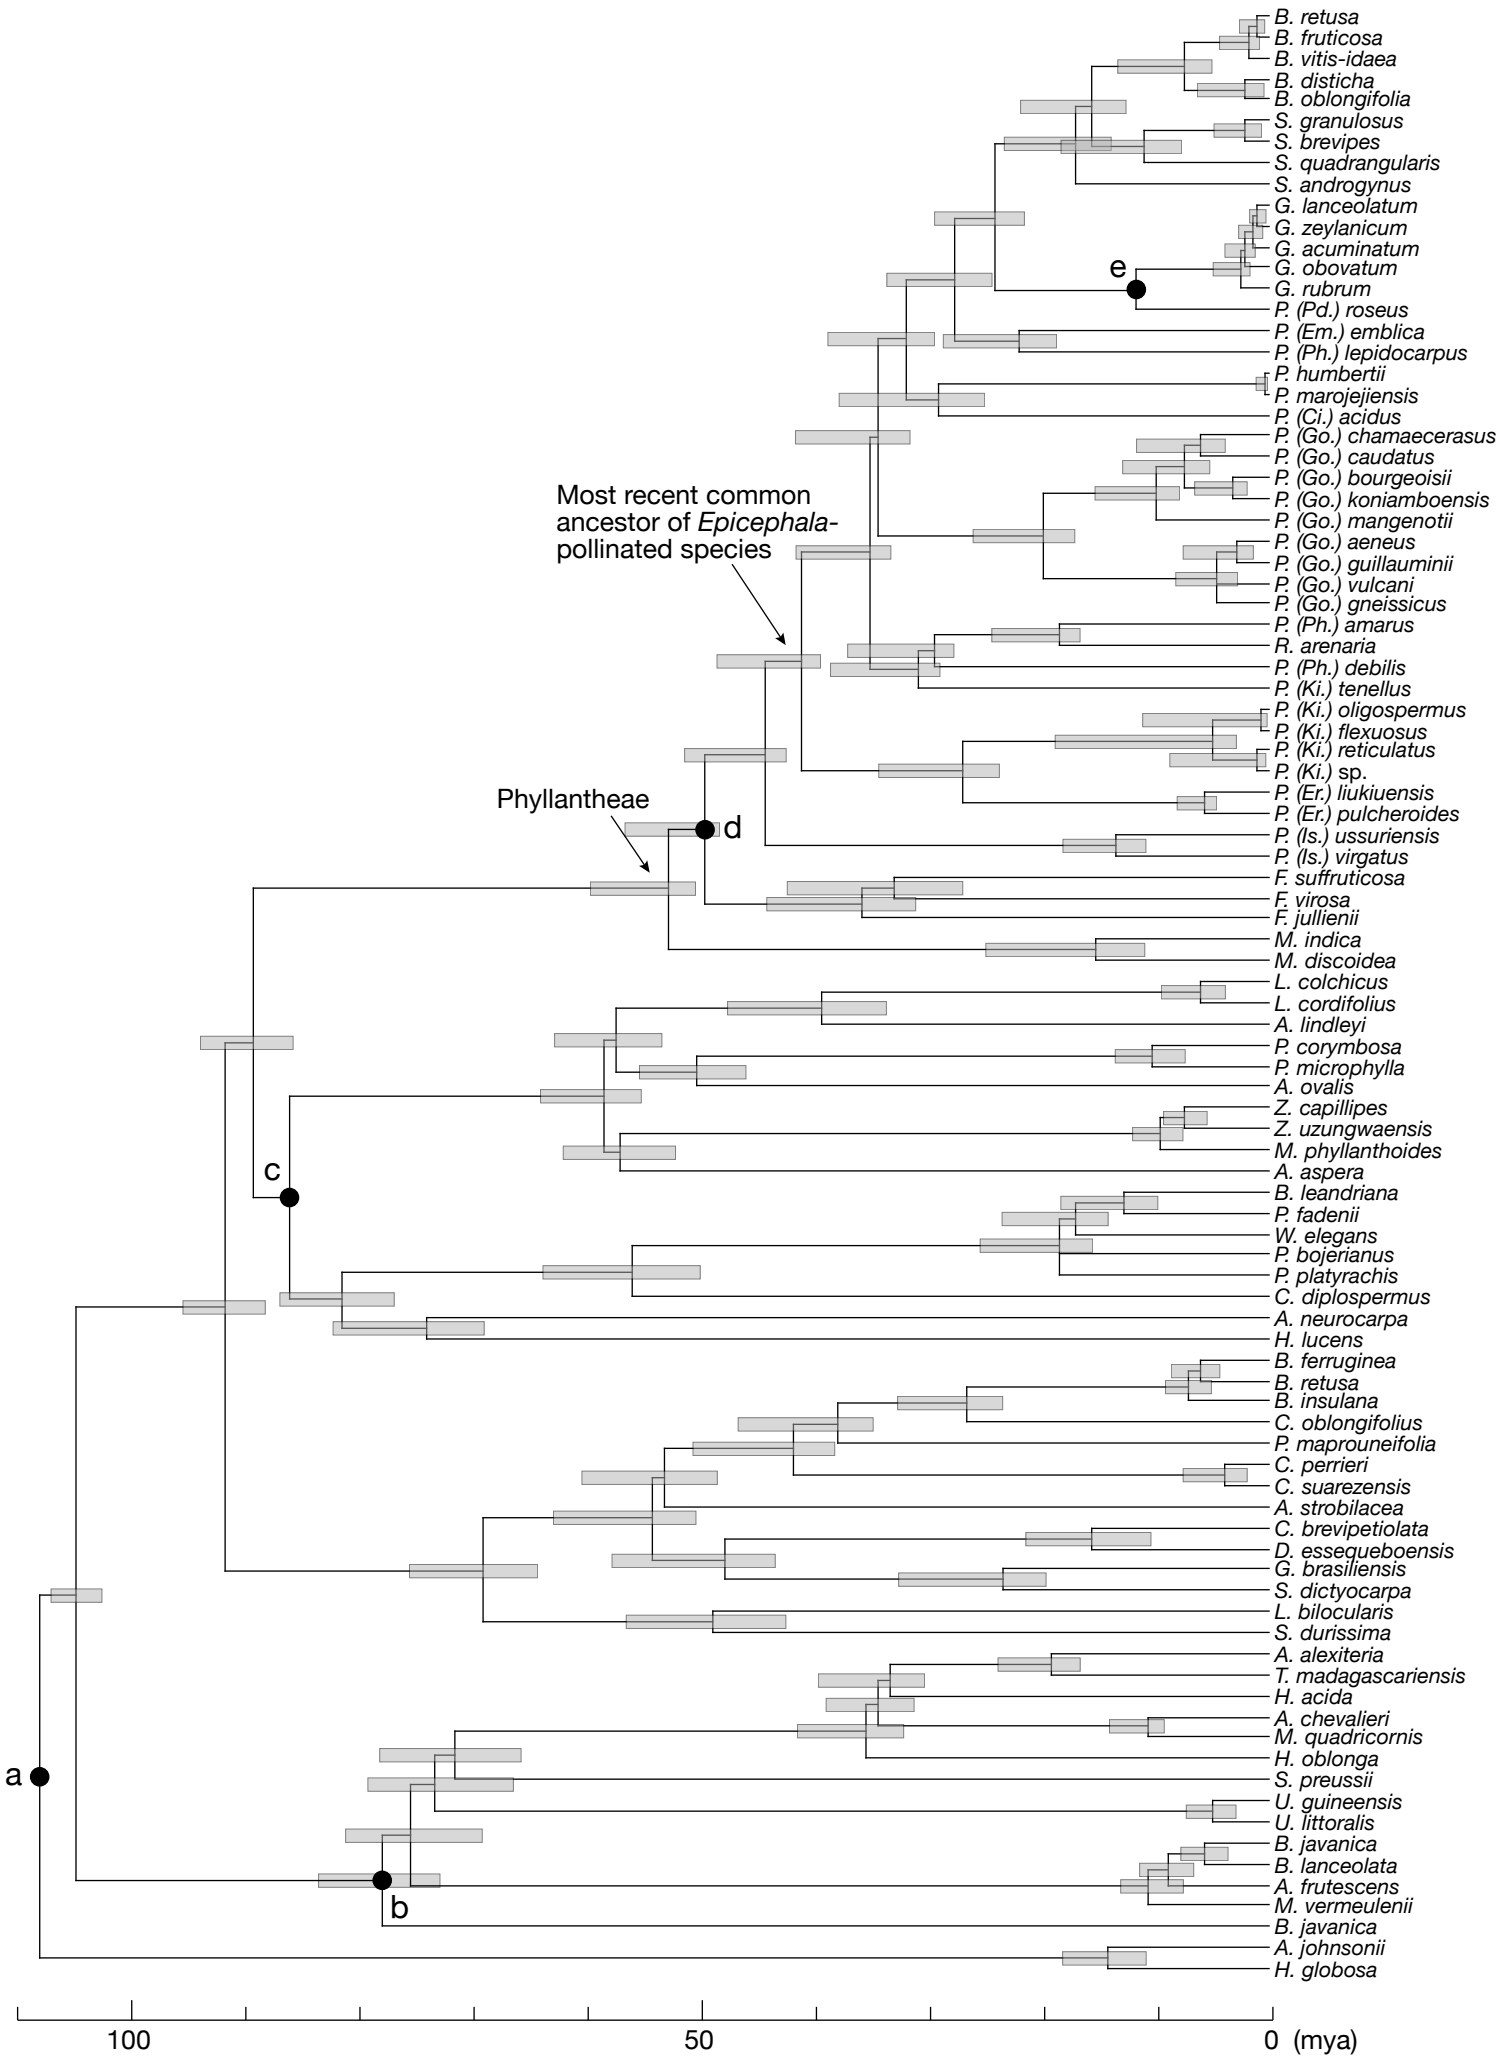

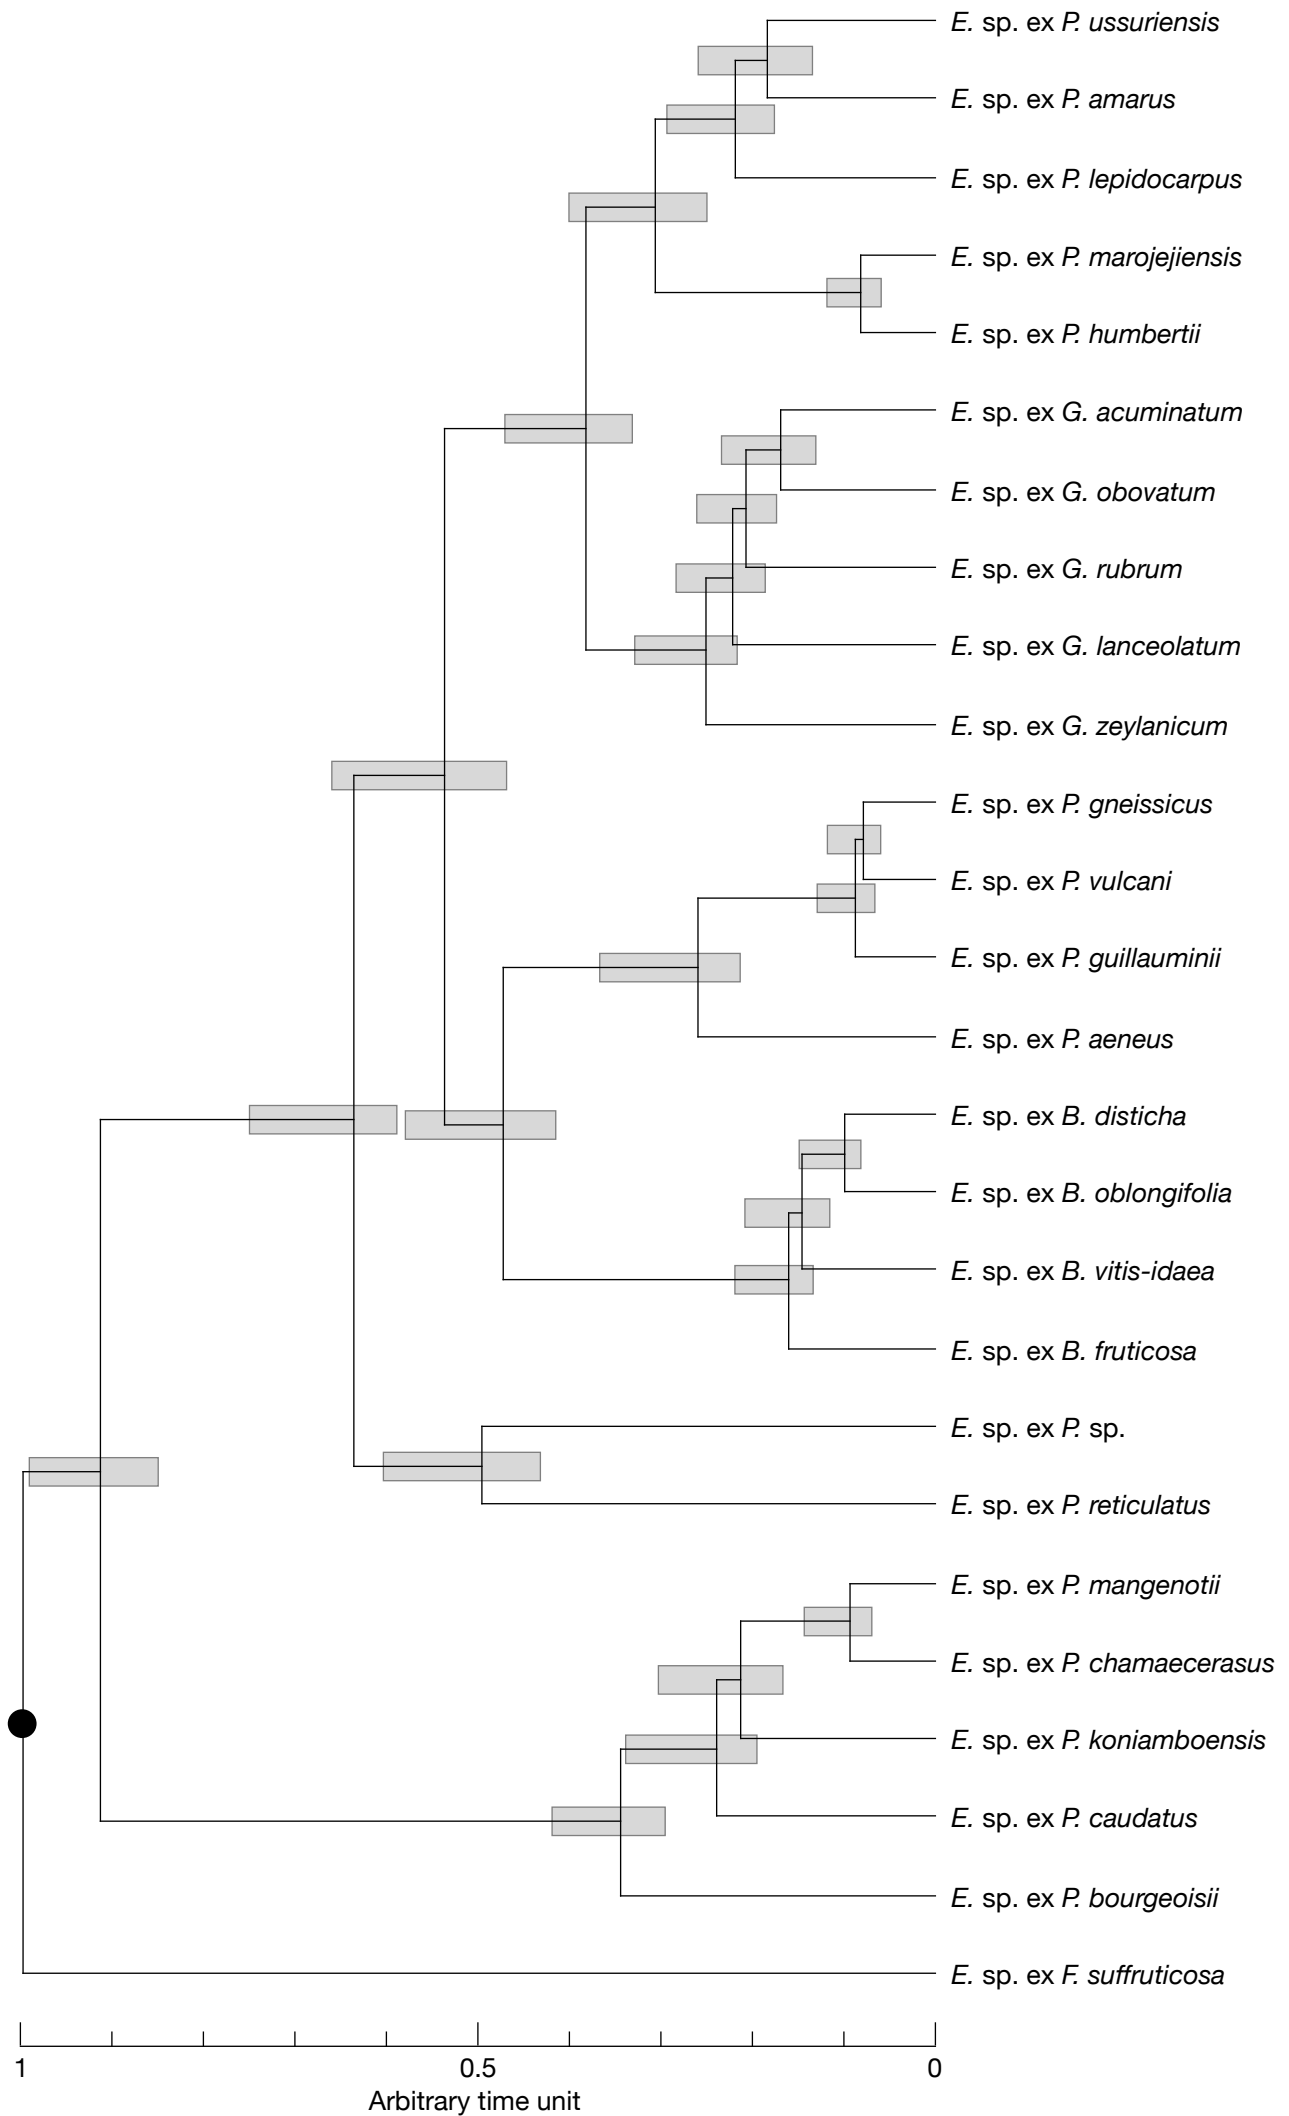

Supplement: rspb20081226s02.pdf [file rspb20081226s02.pdf]
